# Supplementary material for: Effect of High Myopia on Dynamic Changes of Anterior Angle After Pharmacologic Mydriasis in Cataract Patients: A SS-ASOCT Study
Source: PubMed Central journal article supplement (PMC8142703; doi:10.1167/tvst.10.6.25), 2021-05-20
Supplement: tvst-10-6-25_s001.pdf [file tvst-10-6-25_s001.pdf]

**Supplementary Table 1.** Baseline distribution of SS-ASOCT parameters in non-high myopic and high myopic eyes.

| Parameter                | All   |       | Non-High myopia |       | High myopia |       | P-value        |
|--------------------------|-------|-------|-----------------|-------|-------------|-------|----------------|
|                          | Mean  | SD    | Mean            | SD    | Mean        | SD    |                |
| AOD250, mm               | 0.33  | 0.14  | 0.32            | 0.13  | 0.41        | 0.17  | < <b>0.001</b> |
| AOD500, mm               | 0.46  | 0.22  | 0.44            | 0.21  | 0.59        | 0.23  | < <b>0.001</b> |
| AOD750, mm               | 0.65  | 0.30  | 0.62            | 0.29  | 0.84        | 0.32  | < <b>0.001</b> |
| ARA250, mm <sup>2</sup>  | 0.13  | 0.07  | 0.13            | 0.07  | 0.15        | 0.08  | <b>0.001</b>   |
| ARA500, mm <sup>2</sup>  | 0.23  | 0.11  | 0.22            | 0.10  | 0.28        | 0.12  | < <b>0.001</b> |
| ARA750, mm <sup>2</sup>  | 0.37  | 0.17  | 0.36            | 0.17  | 0.46        | 0.19  | < <b>0.001</b> |
| TISA250, mm <sup>2</sup> | 0.08  | 0.04  | 0.08            | 0.03  | 0.09        | 0.04  | < <b>0.001</b> |
| TISA500, mm <sup>2</sup> | 0.18  | 0.07  | 0.18            | 0.07  | 0.22        | 0.09  | < <b>0.001</b> |
| TISA750, mm <sup>2</sup> | 0.33  | 0.14  | 0.31            | 0.13  | 0.41        | 0.16  | < <b>0.001</b> |
| TIA250, degree           | 37.44 | 15.28 | 36.28           | 14.87 | 42.12       | 15.98 | < <b>0.001</b> |
| TIA500, degree           | 32.55 | 12.67 | 31.09           | 11.71 | 39.69       | 13.85 | < <b>0.001</b> |
| TIA750, degree           | 33.25 | 12.72 | 31.92           | 12.26 | 40.47       | 12.00 | < <b>0.001</b> |
| LV, mm                   | 0.23  | 0.33  | 0.25            | 0.32  | 0.05        | 0.29  | < <b>0.001</b> |
| ACW, mm                  | 11.48 | 0.43  | 11.45           | 0.43  | 11.61       | 0.45  | < <b>0.001</b> |
| ATA, mm                  | 11.68 | 0.55  | 11.66           | 0.56  | 11.83       | 0.52  | <b>0.003</b>   |

AOD=angle open distance; ARA=angle recess area; TISA=trabecular-iris space area;

TIA= trabecular-iris angle; ACD= central anterior chamber depth; LV=lens vault;

ACW=anterior chamber width; ATA=angle to angle width.

Bold indicates statistical significance.

**Supplementary Table 2.** Multivariate linear regression of percent  $\Delta$ AOD500 after adjusting each other factors and changes of pupil diameter after pupil dilation.

| Parameter                                  | Coefficient (95%CI)    | P-value        |
|--------------------------------------------|------------------------|----------------|
| Age, per 1-year increase                   | -2.74 (-3.12, -2.35)   | < <b>0.001</b> |
| Presence of high myopia (AL>26.0 mm)       | 15.09 (5.51, 24.68)    | <b>0.002</b>   |
| TISA500, per 1-mm <sup>2</sup> increase    | 74.36 (31.85, 116.88,) | <b>0.001</b>   |
| ATA, per 1-mm increase                     | 10.96 (5.37, 16.56)    | < <b>0.001</b> |
| $\Delta$ Pupil diameter, per 1-mm increase | -1.42 (-5.29, 2.45)    | 0.472          |

AL=Axial length; TISA=trabecular-iris space area; ATA=Angle to angle width.

Bold indicates statistical significance.
